# Supplementary material
Source: publisher figshare collection journal article supplement (https://acs.figshare.com/ndownloader/files/14950898)
Supplement: Supplementary file 1 [file 14950898]

## Assembly and Evolution of Gemini-Type Peptide Amphiphile with a Di-Lysine Spacer

Ruilian Qi,<sup>†,‡</sup> Jian Liu,<sup>§,‡</sup> Na Zhang,<sup>†,‡</sup> Xiuling Ji,<sup>†</sup> Yuchun Han,<sup>\*,†</sup> and Yilin Wang<sup>\*,†,‡</sup>

<sup>†</sup>Key Laboratory of Colloid, Interface and Chemical Thermodynamics and <sup>§</sup>Key Laboratory of Molecular Nanostructure and Nanotechnology, Beijing National Laboratory for Molecular Sciences (BNLMS), CAS Research/Education Center for Excellence in Molecular Sciences, Institute of Chemistry, Chinese Academy of Sciences, Beijing 100190, P. R. China.

<sup>‡</sup>University of Chinese Academy of Sciences, Beijing 100049, P. R. China

### Table of Contents

|                                                            |         |
|------------------------------------------------------------|---------|
| Figure S1 Time-dependent IR spectra                        | Page S2 |
| Figure S2 pH titration curve                               | Page S2 |
| Figure S3 UV absorbance change with time at pH 7.4         | Page S2 |
| Figure S4 Cryo-TEM image at pH 7.4 and 25 °C               | Page S3 |
| Figure S5 Cryo-TEM image at pH 3.0 and 50 °C               | Page S3 |
| Figure S6 DSC thermograms at different concentrations      | Page S3 |
| Figure S7 DSC thermograms of different peptide amphiphiles | Page S4 |

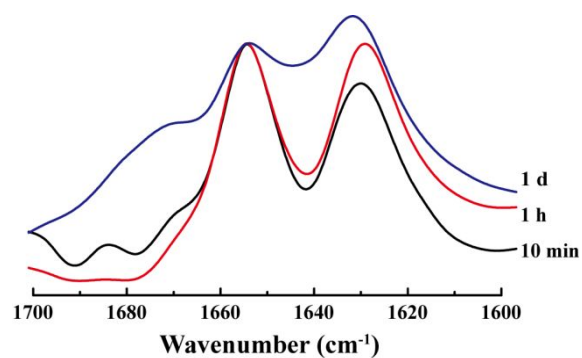

**Figure S1.** Time-dependent IR spectra of the dried 12-(Lys)<sub>2</sub>-12 samples. Three curves are normalized at 1655 cm<sup>-1</sup>.

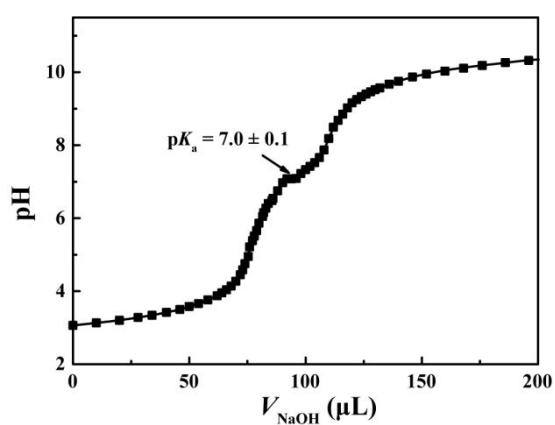

**Figure S2.** pH titration curve of 0.70 mM 12-(Lys)<sub>2</sub>-12 solution at 25.0 °C.

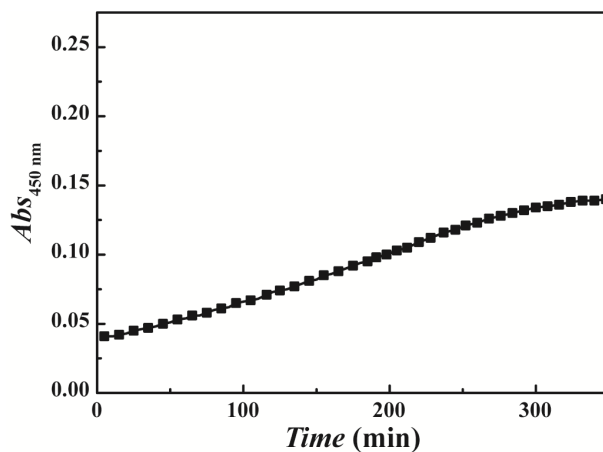

**Figure S3.** UV absorbance change with time of 0.70 mM 12-(Lys)<sub>2</sub>-12 solution at pH 7.4 and 25.0 °C.

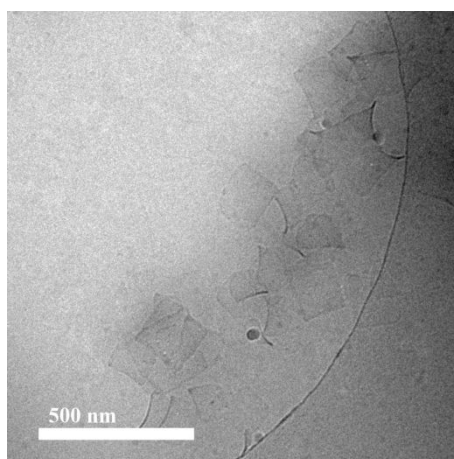

**Figure S4.** Cryo-TEM image of 0.70 mM 12-(Lys)<sub>2</sub>-12 solution at pH 7.4 and 25.0 °C.

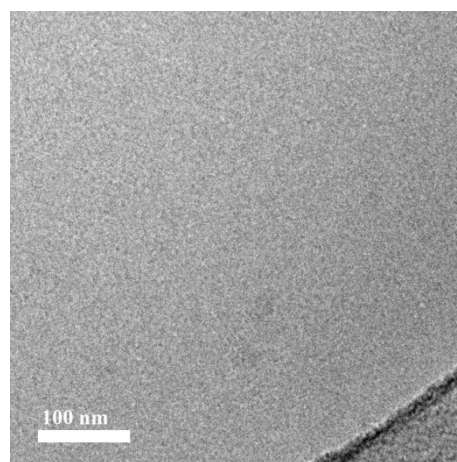

**Figure S5.** Cryo-TEM image of 0.70 mM 12-(Lys)<sub>2</sub>-12 solution at pH 3.0 and 50.0 °C.

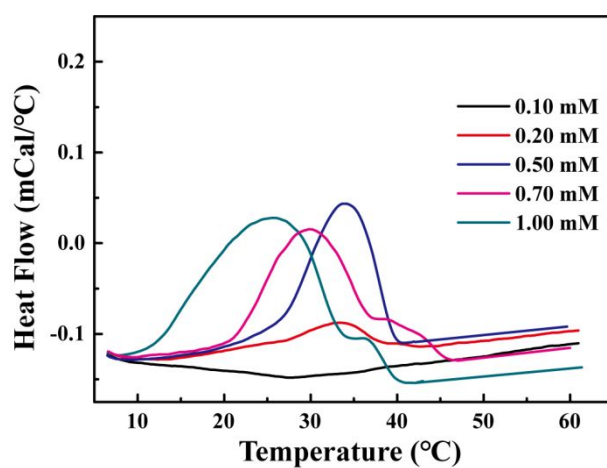

**Figure S6.** DSC thermograms of different concentrations of 12-(Lys)<sub>2</sub>-12 solutions at pH 3.0.

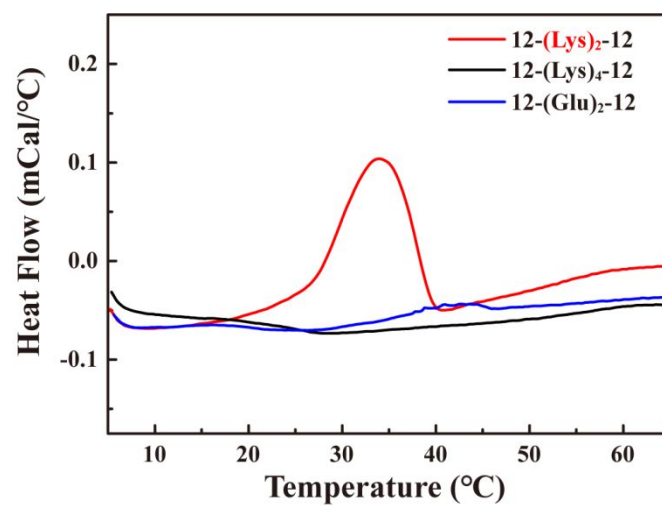

**Figure S7.** DSC thermograms of 12-(Lys)<sub>2</sub>-12 at pH 3.0 (red line), 12-(Lys)<sub>4</sub>-12 at pH 3.0 (black line) and 12-(Glu)<sub>2</sub>-12 at pH 11.0 (blue line). The concentrations of these PAs used are 0.70 mM.
